# Supplementary material for: Expectations and perception of cancer treatment goals in previously untreated patients. The EXPECT trial
Source: PubMed Central journal article supplement (PMC8163685; doi:10.1007/s00520-020-05826-x), 2020-11-07

# EXPECT Fragebogen (Teil 1):

Geburtsjahr: \_\_\_\_\_

Größe: \_\_\_\_\_

heutiges Datum: \_\_\_\_\_

Gewicht: \_\_\_\_\_

**Wie oft hat ihr Arzt,**

**Ihnen sorgfältig zugehört**

|                                                     |   |   |   |   |
|-----------------------------------------------------|---|---|---|---|
| <i>nie (1), selten (2), manchmal (3), immer (4)</i> | 1 | 2 | 3 | 4 |
|-----------------------------------------------------|---|---|---|---|

**Ihnen Dinge für Sie verständlich erklärt**

|                                                     |   |   |   |   |
|-----------------------------------------------------|---|---|---|---|
| <i>nie (1), selten (2), manchmal (3), immer (4)</i> | 1 | 2 | 3 | 4 |
|-----------------------------------------------------|---|---|---|---|

**Ihnen die Information über Ihre Erkrankung und Therapie gegeben die Sie wollten**

|                                                     |   |   |   |   |
|-----------------------------------------------------|---|---|---|---|
| <i>nie (1), selten (2), manchmal (3), immer (4)</i> | 1 | 2 | 3 | 4 |
|-----------------------------------------------------|---|---|---|---|

**Sie ermutigt krankheitsbezogene Fragen zu stellen?**

|                                                     |   |   |   |   |
|-----------------------------------------------------|---|---|---|---|
| <i>nie (1), selten (2), manchmal (3), immer (4)</i> | 1 | 2 | 3 | 4 |
|-----------------------------------------------------|---|---|---|---|

**Nachdem Sie mit Ihrem Arzt über Ihrer Erkrankung und Therapie gesprochen haben, wie sehr glauben Sie, wird Ihnen die Chemotherapie helfen länger zu leben?**

|                                                       |   |   |   |   |
|-------------------------------------------------------|---|---|---|---|
| <i>gar nicht (1), etwas (2), mäßig (3), stark (4)</i> | 1 | 2 | 3 | 4 |
|-------------------------------------------------------|---|---|---|---|

**helfen Ihre Krebserkrankung zu heilen?**

|                                                       |   |   |   |   |
|-------------------------------------------------------|---|---|---|---|
| <i>gar nicht (1), etwas (2), mäßig (3), stark (4)</i> | 1 | 2 | 3 | 4 |
|-------------------------------------------------------|---|---|---|---|

**helfen Probleme durch Ihre Krebserkrankung zu bekämpfen?**

|                                                       |   |   |   |   |
|-------------------------------------------------------|---|---|---|---|
| <i>gar nicht (1), etwas (2), mäßig (3), stark (4)</i> | 1 | 2 | 3 | 4 |
|-------------------------------------------------------|---|---|---|---|

**Wie sehr glauben Sie, dass Sie wird die Chemotherapie Ihre gewohnten Alltagstätigkeiten (Einkaufen, Hobbies, soziale Kontakte) beeinträchtigen?**

|                                                       |   |   |   |   |
|-------------------------------------------------------|---|---|---|---|
| <i>gar nicht (1), etwas (2), mäßig (3), stark (4)</i> | 1 | 2 | 3 | 4 |
|-------------------------------------------------------|---|---|---|---|

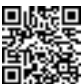

## Welche Nebenwirkungen erwarten Sie sich durch die geplante Chemotherapie?

*gar nicht (1), etwas (2), mäßig (3), stark (4)*

|                                              |   |   |   |   |
|----------------------------------------------|---|---|---|---|
| Appetitlosigkeit...                          | 1 | 2 | 3 | 4 |
| Übelkeit/Erbrechen...                        | 1 | 2 | 3 | 4 |
| Gewichtsverlust...                           | 1 | 2 | 3 | 4 |
| Müdigkeit/Schwäche...                        | 1 | 2 | 3 | 4 |
| Schwindel...                                 | 1 | 2 | 3 | 4 |
| Schmerzen...                                 | 1 | 2 | 3 | 4 |
| Gefühlsstörungen an Armen und/oder Beinen... | 1 | 2 | 3 | 4 |
| Luftnot/Dyspnoe...                           | 1 | 2 | 3 | 4 |
| Infektionen...                               | 1 | 2 | 3 | 4 |

|                                                           | ja | nein |
|-----------------------------------------------------------|----|------|
| Sind Sie verheiratet oder in einer Lebensgemeinschaft?    |    |      |
| Leben Sie alleine?                                        |    |      |
| Ist Deutsch Ihre Muttersprache?                           |    |      |
| Wurden Sie in Österreich geboren?                         |    |      |
| Nehmen Sie an einer onkologischen Selbsthilfegruppe teil? |    |      |

| Welche Ausbildung haben Sie abgeschlossen? | ja | nein |
|--------------------------------------------|----|------|
| Pflichtschule                              |    |      |
| Lehre                                      |    |      |
| Matura                                     |    |      |
| Universität/Fachhochschule                 |    |      |

|                                                |  |  |
|------------------------------------------------|--|--|
| Verbringen Sie mehr als 50% des Tages liegend? |  |  |
|------------------------------------------------|--|--|

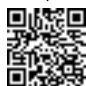

Supplement: 520_2020_5826_MOESM1_ESM.pdf [file 520_2020_5826_MOESM1_ESM.pdf]
