# Supplementary material for: Expectations and perception of cancer treatment goals in previously untreated patients. The EXPECT trial
Source: PubMed Central journal article supplement (PMC8163685; doi:10.1007/s00520-020-05826-x), 2020-11-07

EXPECT Fragebogen (Teil 2):

Geburtsjahr: \_\_\_\_\_

heutiges Datum: \_\_\_\_\_

Größe: \_\_\_\_\_

Gewicht: \_\_\_\_\_

1) Welche Nebenwirkungen hatten Sie während der Chemotherapie?

*gar nicht (1), etwas (2), mäßig (3), stark (4)*

|                                              |   |   |   |   |
|----------------------------------------------|---|---|---|---|
| Appetitlosigkeit...                          | 1 | 2 | 3 | 4 |
| Übelkeit/Erbrechen...                        | 1 | 2 | 3 | 4 |
| Gewichtsverlust...                           | 1 | 2 | 3 | 4 |
| Müdigkeit/Schwäche...                        | 1 | 2 | 3 | 4 |
| Schwindel...                                 | 1 | 2 | 3 | 4 |
| Schmerzen...                                 | 1 | 2 | 3 | 4 |
| Gefühlsstörungen an Armen und/oder Beinen... | 1 | 2 | 3 | 4 |
| Luftnot/Dyspnoe...                           | 1 | 2 | 3 | 4 |
| Infektionen...                               | 1 | 2 | 3 | 4 |
| Geschmacksveränderungen                      | 1 | 2 | 3 | 4 |
| Entzündung der Mundschleimhaut               | 1 | 2 | 3 | 4 |

2) ) Konnten Sie Ihren gewohnten Alltag ohne Probleme fortsetzen?

|                         | ja | nein | Ich weiß nicht |
|-------------------------|----|------|----------------|
| Arbeiten im Haushalt... |    |      |                |
| Einkaufen...            |    |      |                |
| Arztbesuche...          |    |      |                |
| Hobbies...              |    |      |                |
| Mit Freunden treffen... |    |      |                |

3) Hat sich Ihr Gesundheitszustand verbessert?

|                                                       |   |   |   |   |
|-------------------------------------------------------|---|---|---|---|
| <i>gar nicht (1), etwas (2), mäßig (3), stark (4)</i> | 1 | 2 | 3 | 4 |
|-------------------------------------------------------|---|---|---|---|

4) Hat sich Ihr Gesundheitszustand verschlechtert?

|                                                       |   |   |   |   |
|-------------------------------------------------------|---|---|---|---|
| <i>gar nicht (1), etwas (2), mäßig (3), stark (4)</i> | 1 | 2 | 3 | 4 |
|-------------------------------------------------------|---|---|---|---|

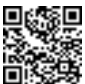

Supplement: 520_2020_5826_MOESM2_ESM.pdf [file 520_2020_5826_MOESM2_ESM.pdf]
